# Supplementary material
Source: Springer Nature journal article supplement (https://www.springermedizin.de/resource/supplementary/12865_2008_224_MOESM4_ESM.pdf/9427624)

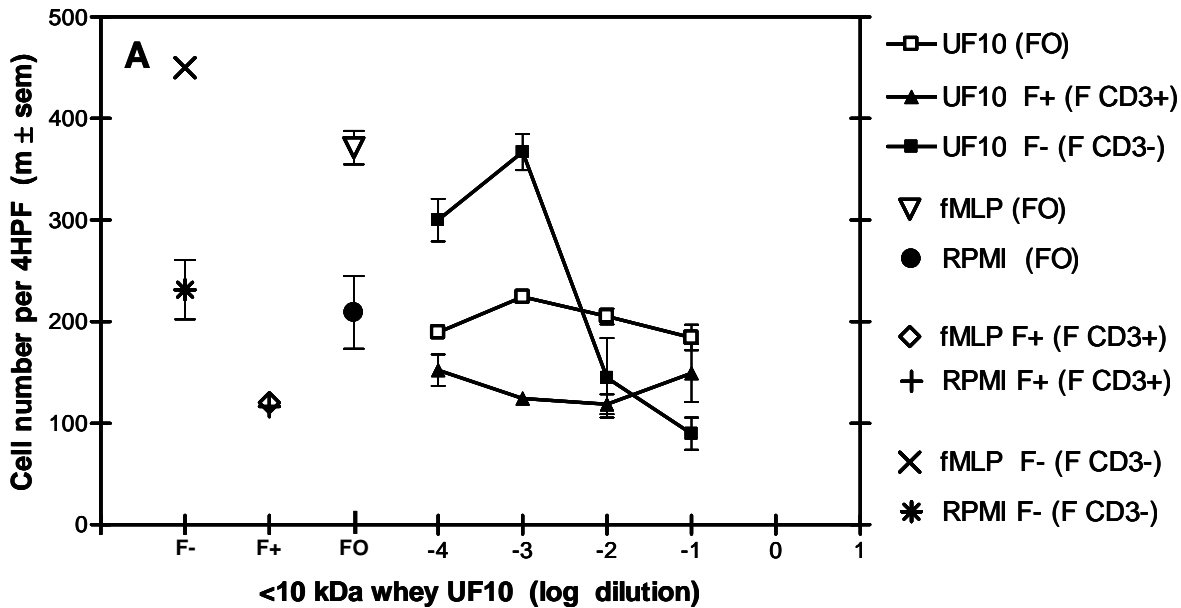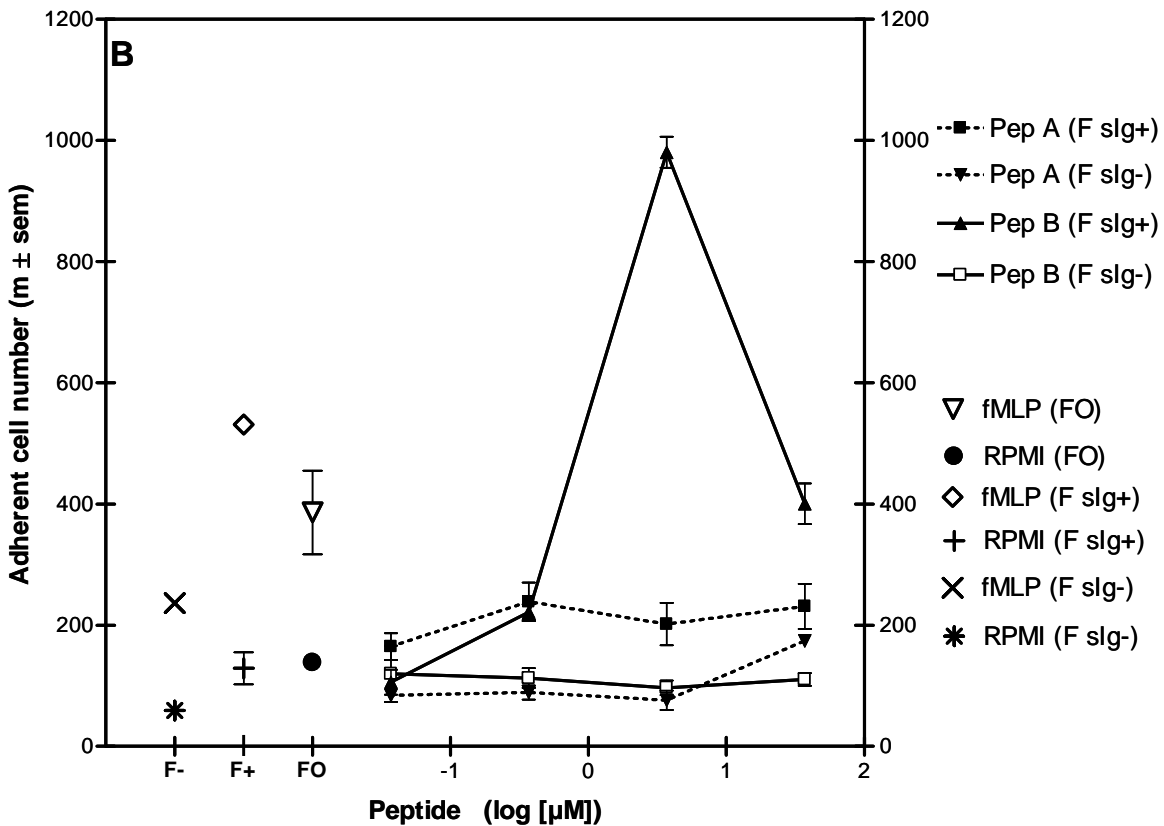

Supplement: MOESM4 [file 9427624]
